# Supplementary material for: Underwater superoleophobic meshes fabricated by poly(sulfobetaine)/polydopamine co-deposition
Source: Royal Society of Chemistry journal article supplement (doi:10.1039/c5ra05937b), 2015-01-01
Supplement: c5ra05937b1.pdf [file c5ra05937b1.pdf]

## Electronic Supplementary Information

### **Underwater Superoleophobic Meshes Fabricated by Poly(sulfobetaine)/Polydopamine Co-deposition**

Peng-Fei Ren, Hao-Cheng Yang, Yi-Ning Jin, Hong-Qing Liang,  
Ling-Shu Wan\* and Zhi-Kang Xu\*

*MOE Key Laboratory of Macromolecular Synthesis and Functionalization, Department of Polymer Science  
& Engineering, Zhejiang University, Hangzhou 310027, China*

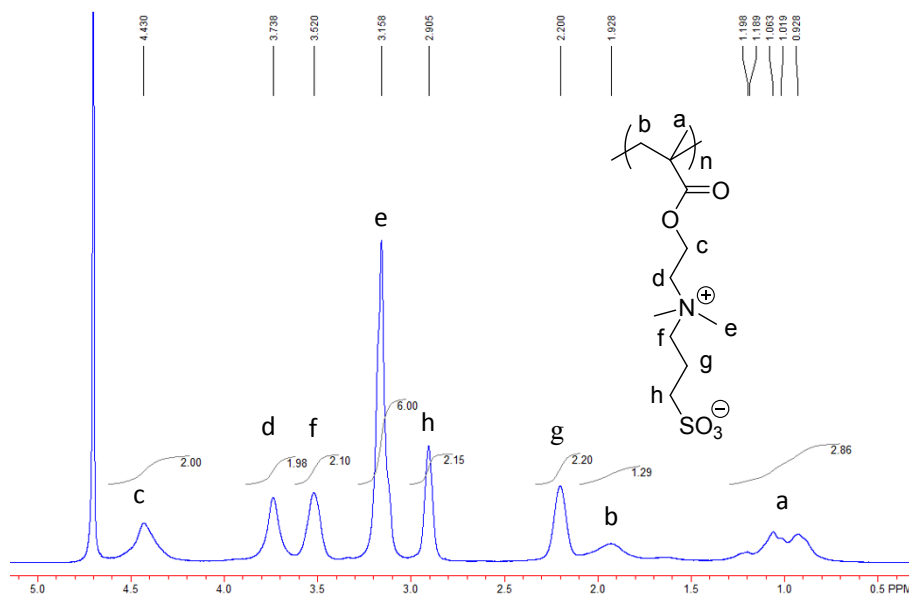

Fig. S1 <sup>1</sup>H NMR spectrum of PSBMA

Table S1. Average molecular weight and polydispersity of PSBMA determined by GPC

| $M_n$<br>( $10^4$ g/mol) | $M_w$<br>( $10^4$ g/mol) | $M_p$<br>( $10^4$ g/mol) | Polydispersity | %<br>Area | $M_{Z+1}$<br>( $10^4$ g/mol) | $M_Z$<br>( $10^4$ g/mol) |
|--------------------------|--------------------------|--------------------------|----------------|-----------|------------------------------|--------------------------|
| 1.20                     | 3.00                     | 2.03                     | 2.50           | 100       | 11.75                        | 6.58                     |

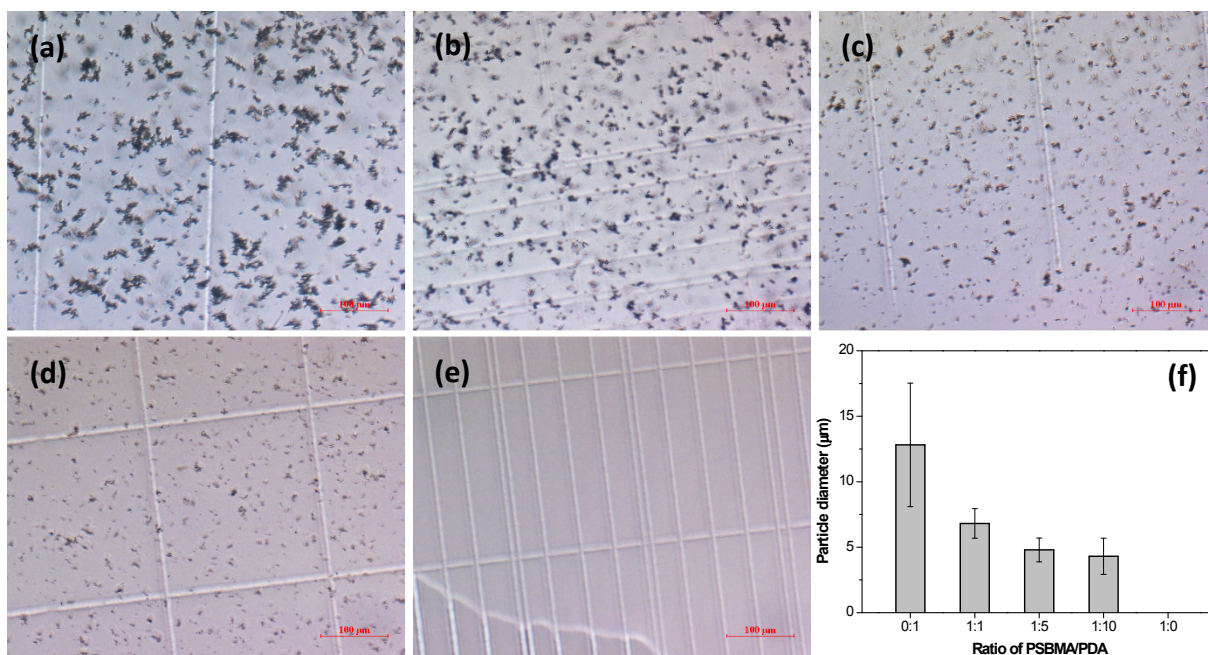

Fig. S2 Morphology and size of the formed particles in the reaction solution with a PSBMA/PA ratio of (a) 0:1, (b) 1:1, (c) 5:1, (d) 10:1 and (e) 1:0, respectively. The particle diameters are calculated and summarized in (f).
